# Supplementary material for: Study on the Spatial and Temporal Characteristics of Mesoscale Drought in China under Future Climate Change Scenarios
Source: MDPI journal article supplement (doi:10.3390/w13192761), 2021-10-06
Supplement: s1 [file s1]

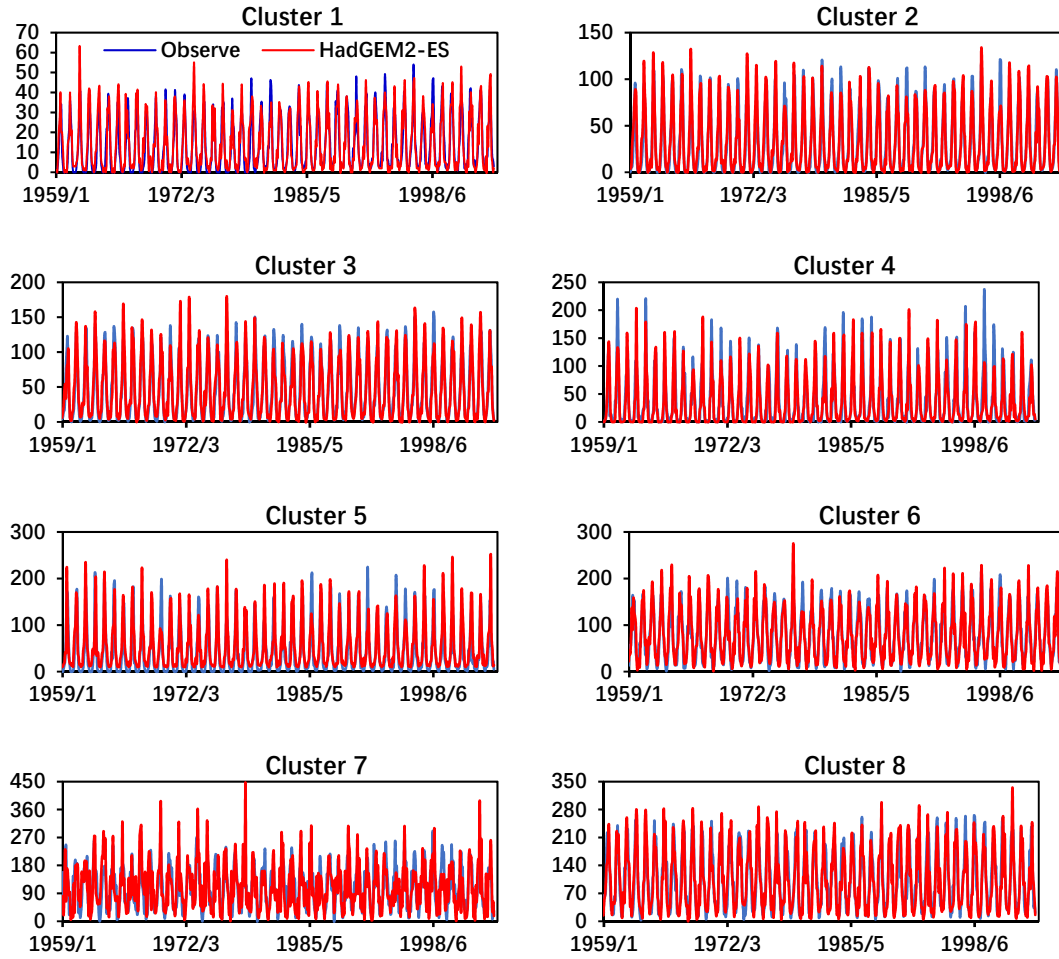

**Figure S1.** Comparison of cluster averages of observed precipitation and precipitation of HadGEM2-ES for various clusters. The blue line indicates observed data and the red line denotes HadGEM2-ES data.

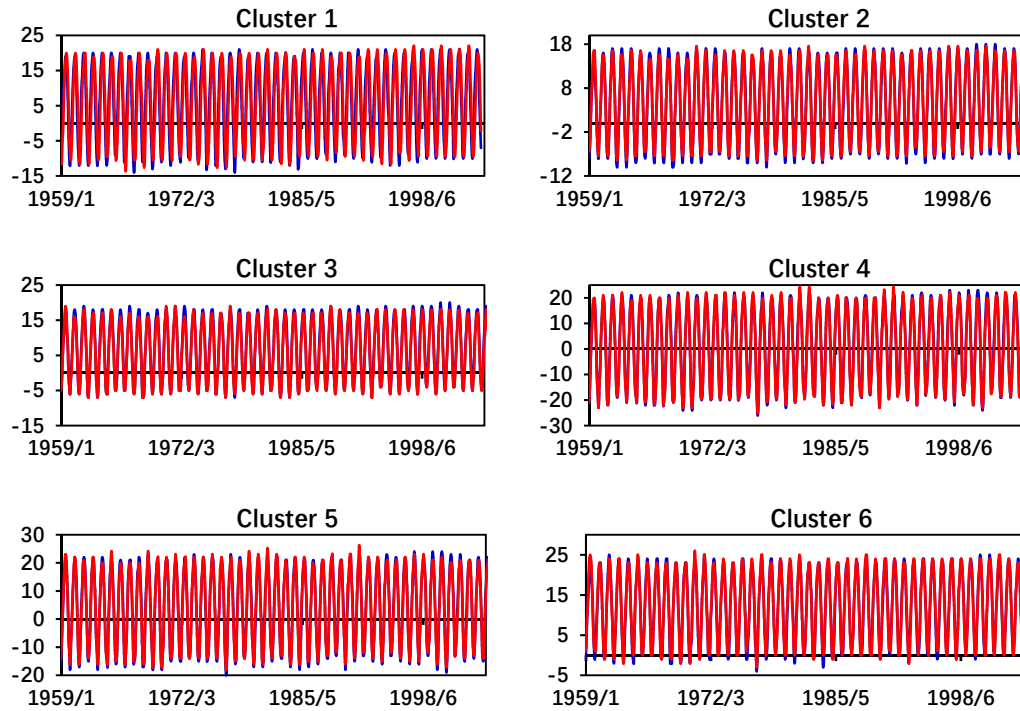

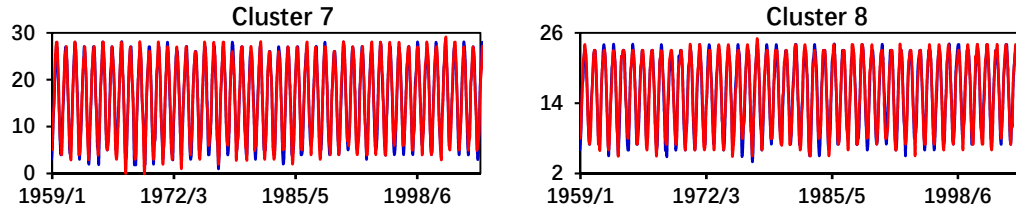

**Figure S2.** Comparison of cluster averages of observed temperature and temperature of HadGEM2-ES for various clusters. The blue line indicates observed data and the red line denotes HadGEM2-ES data.

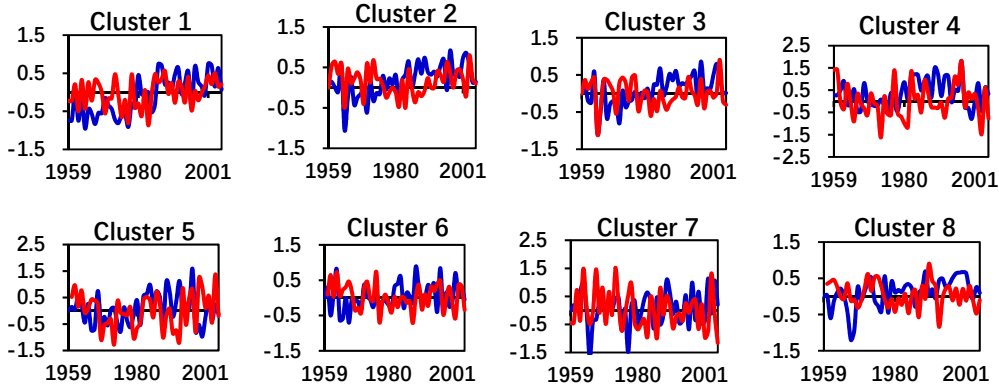

**Figure S3.** Comparison of cluster averages of observed SPI12 and SPI12 of HadGEM2-ES for various clusters. The blue line indicates observed data and the red line denotes HadGEM2-ES data.

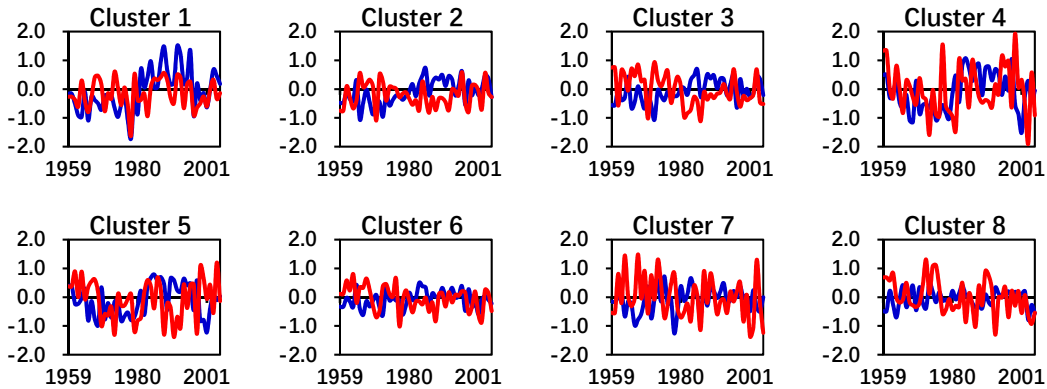

**Figure S4.** Comparison of cluster averages of observed SPEI12 and SPEI12 of HadGEM2-ES for various clusters. The blue line indicates observed data and the red line denotes HadGEM2-ES data.

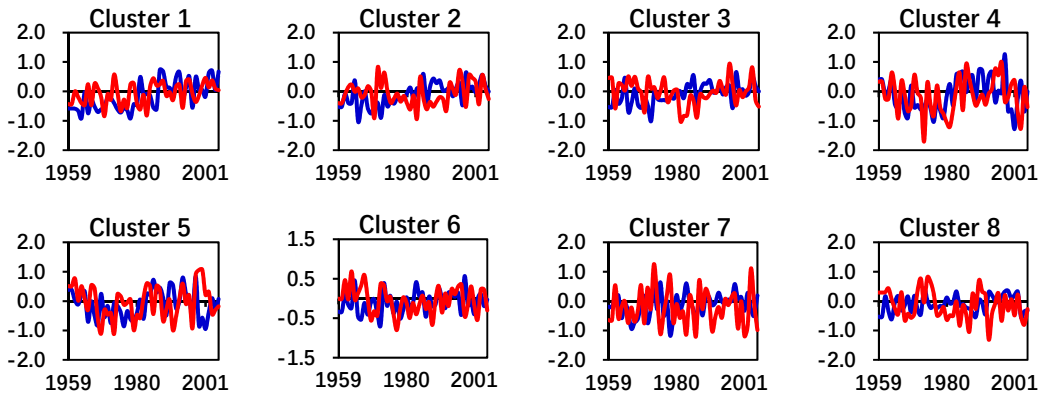

**Figure S5.** Comparison of cluster averages of observed SP\*ETI12 and SP\*ETI12 of HadGEM2-ES for various clusters. The blue line indicates observed data and the red line denotes HadGEM2-ES data.

ES for various clusters. The blue line indicates observed data and the red line denotes HadGEM2-ES data.

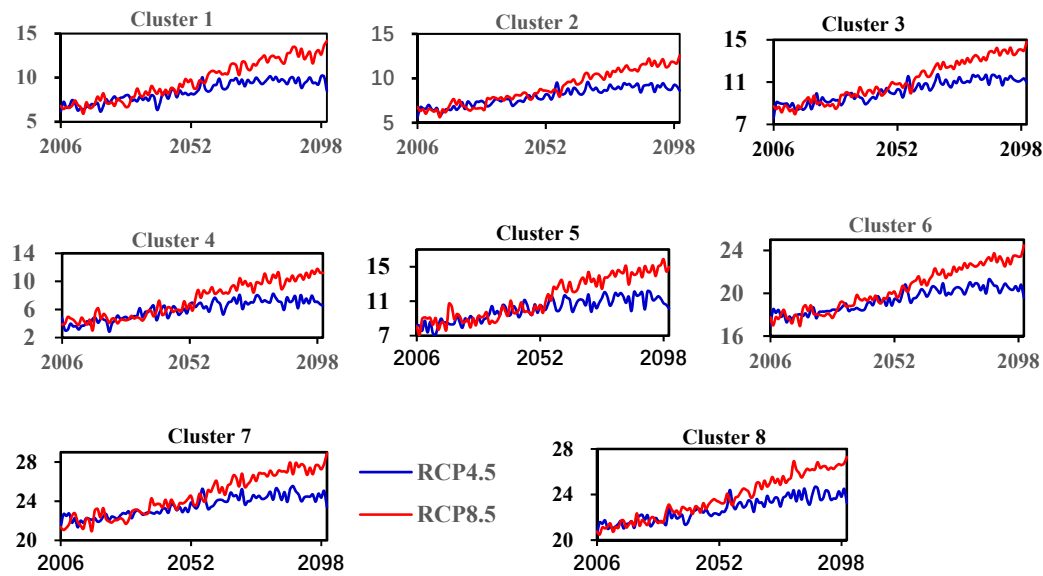

**Figure S6.** Comparison of cluster averages of temperature values of RCP 4.5 and RCP 8.5. The blue line indicates temperature values of RCP 4.5 and the red line denotes temperature values of RCP8.5.

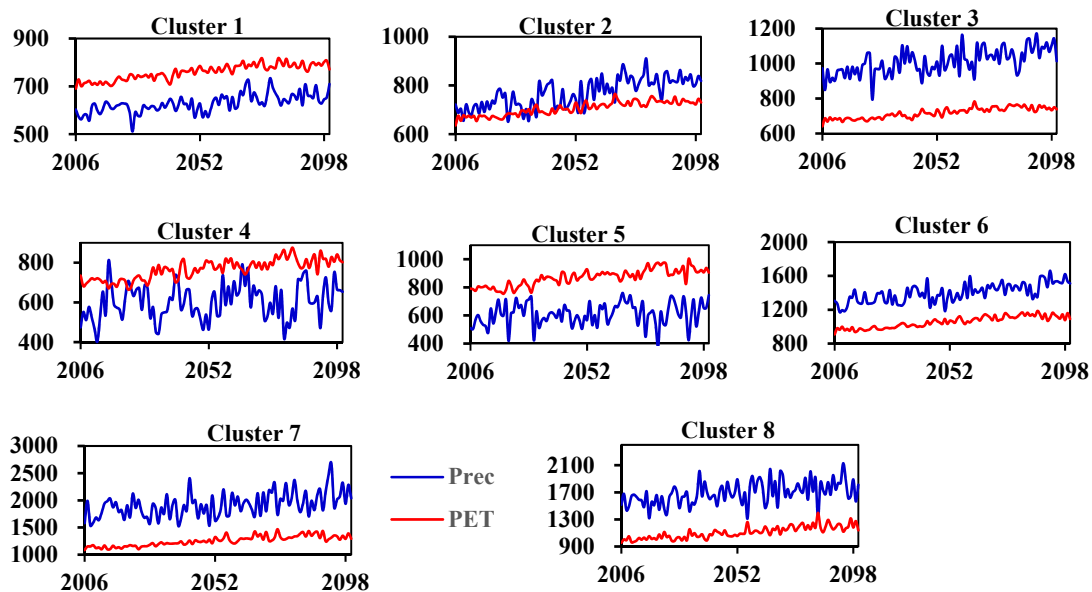

**Figure S7.** Temporal variation in the cluster averages of precipitation (Prec; mm) and potential evapotranspiration (PET; mm) under RCP 4.5. The blue line indicates precipitation data and the red line denotes potential evapotranspiration data.

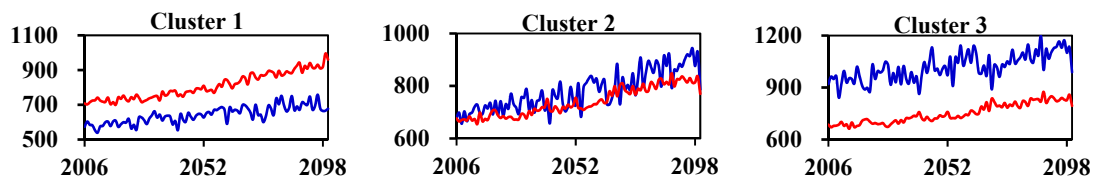

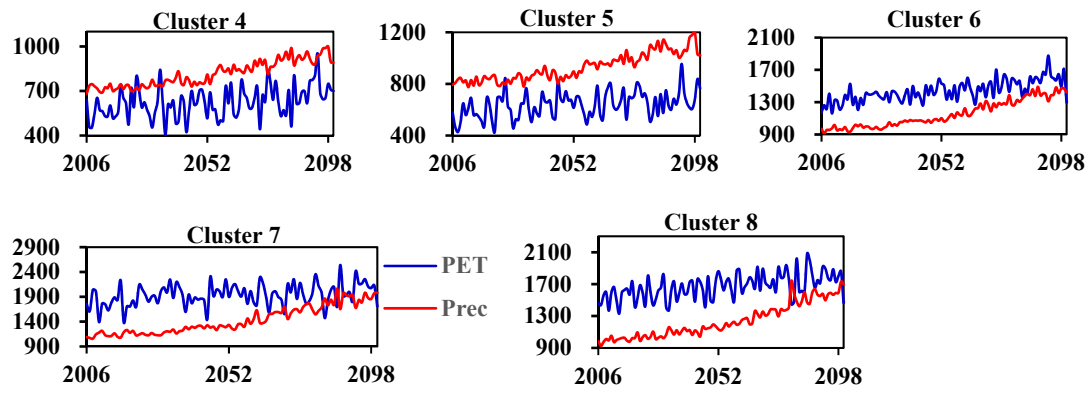

**Figure S8.** Temporal variation in the cluster averages of precipitation (Prec; mm) and potential evapotranspiration (PET; mm) under RCP 8.5. The blue line indicates potential evapotranspiration data and the red line denotes precipitation data.
